**A-454 Room F, 10/17/2000 9:00 AM - 11:00 AM (PS)**  
**Anti-TNF Treatment Reduces Mortality during E. Coli but Not during an Equally Severe S. Aureus Pneumonia** *W. Karzai, MD; B. Mehlborn, MD; F. Bloos, MD, PhD; K. Reinbart, MD, Department of Anesthesiology, University Hospital, Jena, Germany.* We treated rats during S.aureus or E.coli pneumonia with anti-TNF serum. Anti-TNF serum improved survival during E.coli but not during S.aureus pneumonia.

**A-455 Room F, 10/17/2000 9:00 AM - 11:00 AM (PS)**  
**Leukocyte Activation during Hemofiltration** *Sibylle A. Kozek, MD; Andrea Michalek, MD; Christian K. Spiss, MD; Burkhard Gustorff, MD; Michael Zimpfer, MD, Anesthesiology and General Intensive Care, University of Vienna, Vienna, Austria.* Leukocytes are activated during continuous venovenous hemofilters under heparin anticoagulation with and without prostaglandin infusion.

**A-456 Room F, 10/17/2000 9:00 AM - 11:00 AM (PS)**  
**Role of Nitric Oxide in Lipopolysaccharide-Induced Acute Lung Injury and Lipid Peroxidation in Rats** *Kyoung M. Lee, MD, PhD; Hee U. Kwon, MD; Kong B. Im, MD; Jong T. Park, MD; No Kwak, MD, Anesthesiology and Crit Care Med, Konyang University Hospital, Daejeon, Korea.* Inhibition of the increase of nitric oxide by L-NIL in septic rats may increase lipid peroxidation and worsen lung injury.

**A-457 Room F, 10/17/2000 9:00 AM - 11:00 AM (PS)**  
**Acadesine Attenuates Ischemia-Reperfusion Lung Injury by an Adenosine Mediated Mechanism** *Idit Matot, M.D.; Oded Jurim, M.D., Anesthesiology and Critical Care Medicine, Hadassah Hebrew University Medical Center, Jerusalem, Israel.* In intact chest cats acadesine attenuated lung reperfusion injury. The adenosine receptor blocker 8(p-sulphophenyl) theophylline blocked this effect of acadesine.

**A-458 Room F, 10/17/2000 9:00 AM - 11:00 AM (PS)**  
**Alterations in Endogenous Histamine Production and Histamine Receptor Density at Transcriptional Levels Are Related to Hemodynamic Changes during Septic Shock** *Naoyuki Matsuda, MD; Yuichi Hattori, MD, PhD; Osamu Kemmotsu, MD, PhD; Satoshi Gando, MD, PhD, Anesthesiology & Critical Care and Pharmacology, Hokkaido University School of Medicine, Sapporo, Hokkaido, Japan.* Increased Histamine receptors mRNA.

**A-459 Room F, 10/17/2000 9:00 AM - 11:00 AM (PS)**  
**Evaluation of a Semiquantitative Point of Care Test for the Rapid Measurement of Procalcitonin** *Michael Meisner, MD; Joachim Schmidt, MD; F.M. Brunkborst, MD; Konrad Reinbart, MD, Dpt. of Anaesthesiology, Univ. of Jena, Jena, Germany.* In this study the validity of the new semiquantitative Procalcitonin immunochromatographic assay was evaluated in comparison to the quantitative Lumitest®PCT.

**A-460 Room F, 10/17/2000 9:00 AM - 11:00 AM (PS)**  
**Nafamostat Attenuates Septic Shock and Acute Lung Injury in Sheep** *Kazunori Murakami, MD, PhD; Roy McGuire, MS; Kazutaka Soejima, MD; Lillian D. Traber, RN; Daniel L. Traber, PhD, Department of Anesthesiology, University of Texas Medical Branch, Galveston, TX, United States.* Nafamostat inhibited not only coagulation abnormalities but also hypotension and acute lung injury induced by sepsis in sheep.

**A-461 Room F, 10/17/2000 9:00 AM - 11:00 AM (PS)**  
**Initial Decrease and Sustained Depression of HLA-DR Expression on Monocytes Is Predictive of Outcome in SIRS and Sepsis** *A. Nierbaus, MD; B. Montag; D. Frings; C. Schneider, MD; J. Schulte am Esch, MD, Anesthesiology, University Hospital, Hamburg, Germany.* In 38 ICU-patients with SIRS/Sepsis decrease and course of HLA-DR expression on monocytes correlated significantly with mortality.

**A-462 Room F, 10/17/2000 9:00 AM - 11:00 AM (PS)**  
**Endotoxin-Induced Acute Renal Failure in Rats: Expression of Renal Aquaporins and Effects of Phosphodiesterase Type 3 and 4 Inhibitors** *Niels V. Olsen, D.M.Sc.; Martin Graebe, Medical student; Thomas Jonassen, Reseach fellow; Soren Nielsen, D.M.Sc.; Sten Christensen, D.M.Sc., Department of Neuroanaesthesia, Copenhagen University Hospital, Copenhagen, Denmark.* Milrinone and Ro-20-1724 aggravated LPS-induced renal failure.

**A-463 Room F, 10/17/2000 9:00 AM - 11:00 AM (PS)**  
**Is Procalcitonin Superior to C-Reactive Protein to Predict Persistent Postoperative Intraabdominal Sepsis?** *Catherine Paugamburtz, MD; Christophe Vadam, MD; Monique Deboux, MD, PhD; Herve Dupont, MD; Jean Mantz, PM, PhD, Anesthesiology, Hopital Bicbat, Paris, France.* Procalcitonin and C-Reactive Protein do not help to predict persistent intrabdominal sepsis in critically ill patients.

**A-464 Room F, 10/17/2000 9:00 AM - 11:00 AM (PS)**  
**The Effect of Circulating Cytokines during Septic Shock on Traumatic Memories in Survivors** *Gustav Schelling, MD; Christian Stoll, MD; Marianne Jochum, MD; Cornelia Gippert-Steppert, MD; Josef Briegel, MD, Anesthesiology, Ludwig-Maximilians University, Munich, Germany.* IL-2sR was associated with nightmares/hallucinations and IL-6/IL-8 with memories of severe pain or respiratory distress.

**A-465 Room F, 10/17/2000 9:00 AM - 11:00 AM (PS)**  
**iNOS-Inhibition with L-NIL but Not L-NAME Reduces Plasma Nitrate to Control Levels in a Septic Rat Model** *Maik Schneuing, MS; Lars G. Fischer, MD; Volker Strunk, MS; George F. Rich, MD, PhD, Anesthesiology, University of Virginia, Charlottesville, VA, United States.* Selective iNOS inhibitor with L-NIL but not nonselective with L-NAME reduced nitrate plasma concentrations to control levels.

**A-466 Room F, 10/17/2000 9:00 AM - 11:00 AM (PS)**  
**Sevoflurane Provides Preconditioning-Like Cardioprotective Effects on Septic Rat Myocardium** *Ryobei Serita, MD; Junya Oshida, MD; Yoshifumi Kotake, MD; Junzo Takeda, MD; Hiroshi Morisaki, MD, Anesthesia, Kasumigaura National Hospital, Tsuchiura, Ibaraki, Japan.* In an isolated working heart from septic rat, pre-exposure of sevoflurane before ischemia preserved myocardial function.

**A-467 Room F, 10/17/2000 9:00 AM - 11:00 AM (PS)**  
**iNOS Inhibitors Prevent LPS-Induced Hyperglycemia and Insulin Resistance in Rats** *H. Sugita, MD; M. Kaneki, MD, PhD; S. Yasubara, MD, PhD; M. Sugita, MD, PhD; J. Martyn, MD, Mass. Gen. Hosp., Harvard Medical School, Boston, MA, United States.* Insulin resistance and muscle wasting occur in critical illness. Inhibitor of inducible nitric oxide (iNOS), aminoguanidine, decreased LPS-induced insulin resistance in rats.
